# Supplementary material for: Bifunctional ultraviolet/ultrasound responsive composite TiO2/polyelectrolyte microcapsules
Source: Royal Society of Chemistry journal article supplement (doi:10.1039/c5nr06666b), 2016-01-01
Supplement: c5nr06666b1.pdf [file c5nr06666b1.pdf]

## Supporting Information

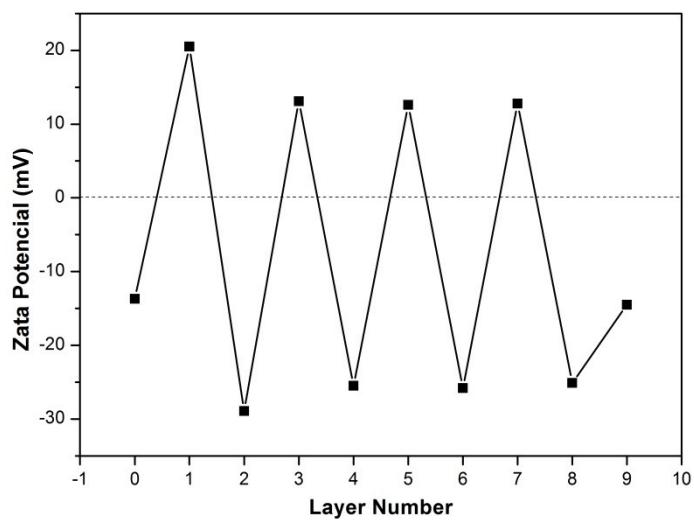

Figure S1. Zeta potential vs. layer number for the LBL self-assembly of PSS, PAH and titania coating. The layer numbers 1, 3, 5 and 7 correspond to PAH assembly and 2, 4, 6 and 8 correspond to PSS assembly. Layer number 9 corresponds to titania coating. Layer number 0 corresponds to  $\text{CaCO}_3$  cores.

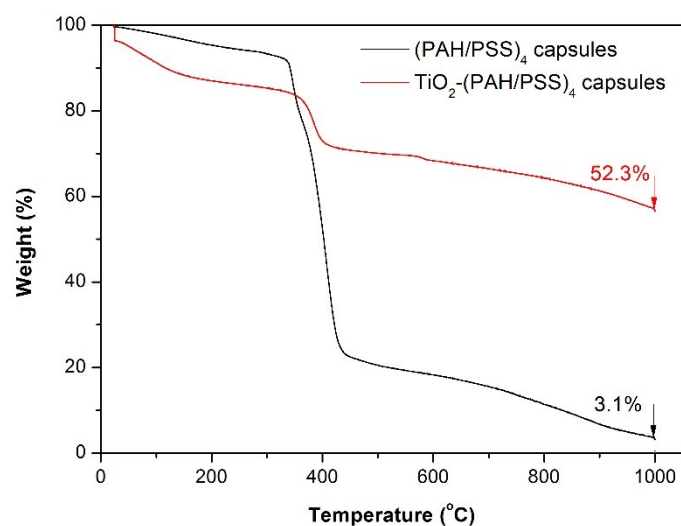

Figure S2. Thermogravimetric analysis (TGA) profiles of  $(\text{PAH/PSS})_4$  capsules and  $\text{TiO}_2$ /PE composite capsules.

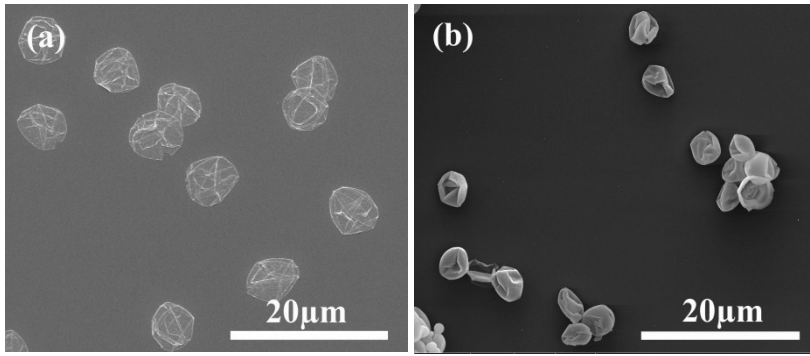

Figure S3. SEM images of (PAH/PSS)<sub>4</sub> capsules before (a) and after (b) *in situ* TiO<sub>2</sub> coating for 72 hours. (PAH/PSS)<sub>4</sub> capsules were prepared by LbL method using SiO<sub>2</sub> microparticles (5.53 μm) as sacrificial templates. TiO<sub>2</sub> coating was produced in the exact same procedure.

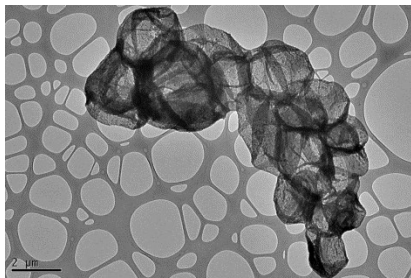

Figure S4. TEM images of pure (PAH/PSS)<sub>4</sub> capsules

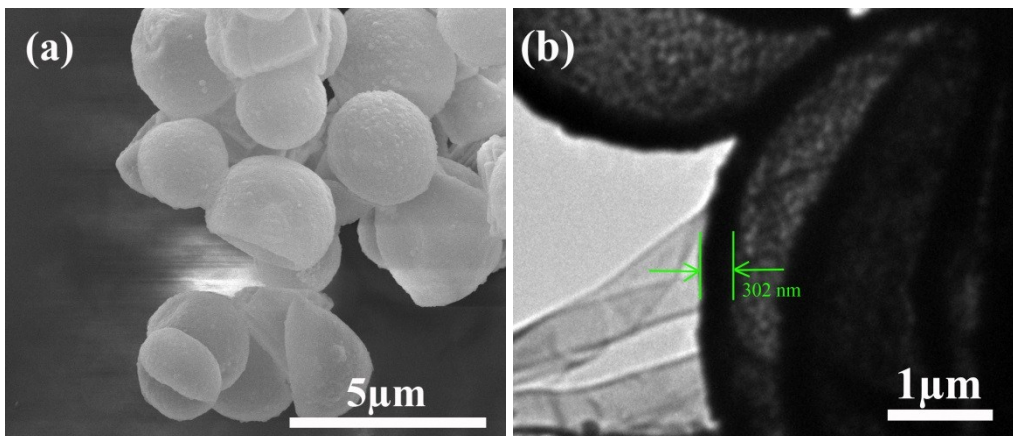

Figure S5. SEM (a) and TEM (b) images of SiO<sub>2</sub>-(PSS/PAH)<sub>4</sub> composite microcapsules synthesized by LbL method and sol-gel chemistry.<sup>[5]</sup>

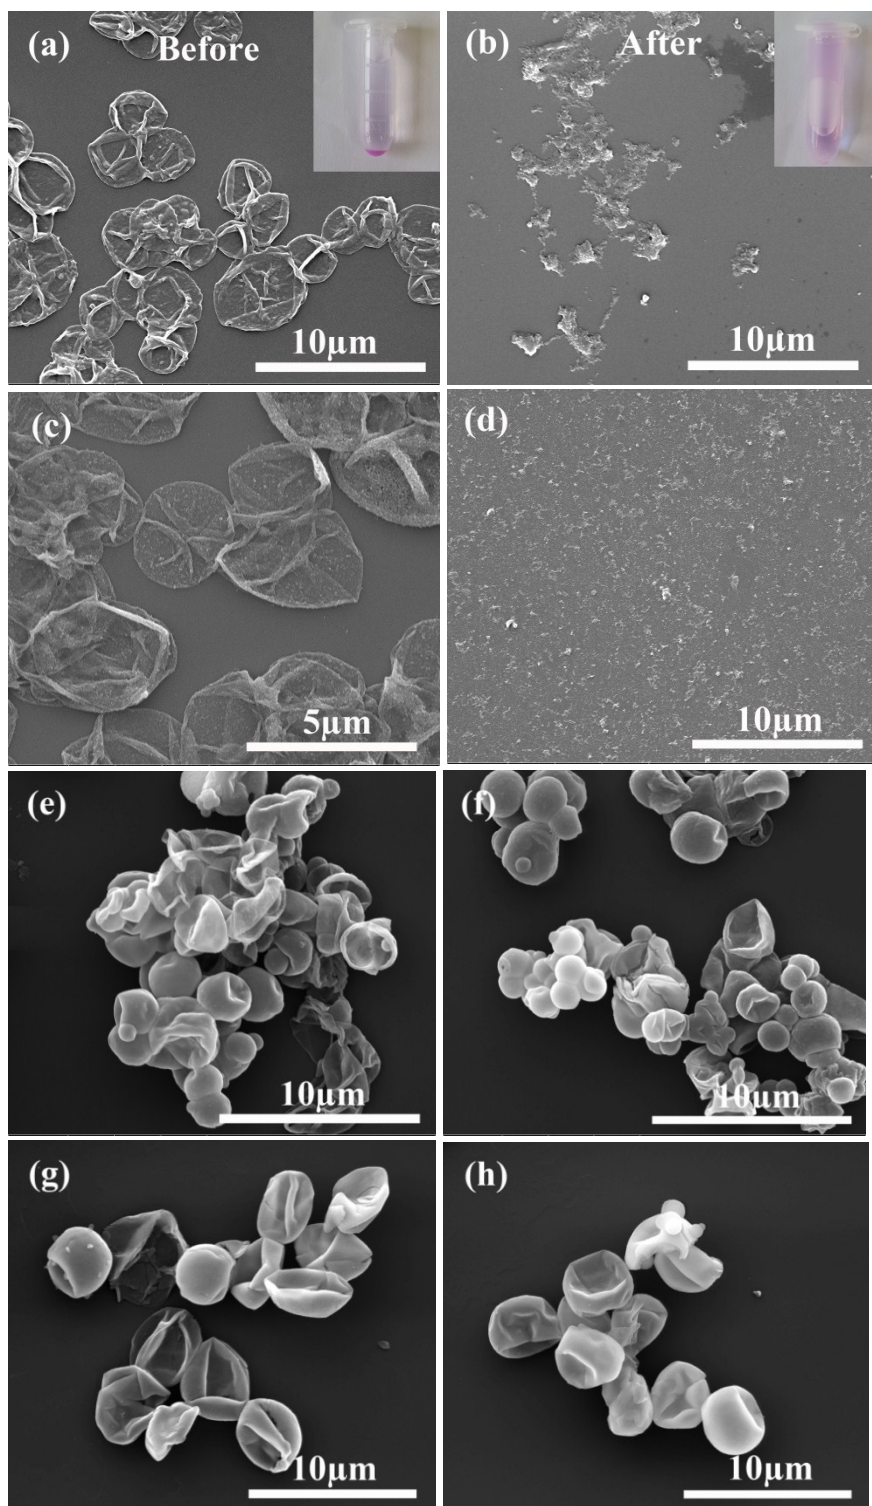

Figure S6. SEM images of capsules before and after NaOH (pH=13) treatment. (a, b) (PAH/PSS)<sub>4</sub> microcapsules, before and after soaking in NaOH for 2 minutes; (c, d) TiO<sub>2</sub>/PE capsules with *in situ* titania coating for 24 hours, before and after soaking in NaOH solution for 10 minutes respectively; (e, f) TiO<sub>2</sub>/PE capsules with *in situ* coating for 72 hours, before and after soaking for 10 minutes respectively; (g, h) TiO<sub>2</sub>/PE capsules (SiO<sub>2</sub> sacrificial templates) with *in situ* coating for 72 hours, before and after soaking in NaOH solution for 10 minutes respectively. The insets are images of pure (PAH/PSS)<sub>4</sub> labelled with TRITC dyes centrifuged at 8000r min<sup>-1</sup> for 2 minutes before and after NaOH (pH=13) treatment for 2 minutes.

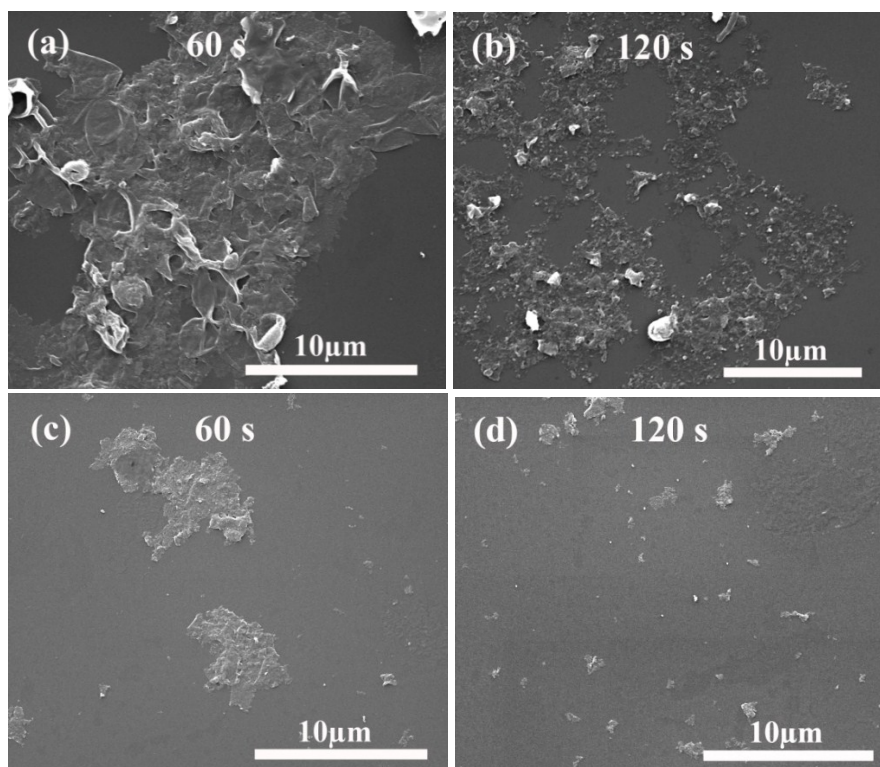

Figure S7. SEM images of different capsules treated by ultrasound for different longer time: (a,b) (PAH/PSS)<sub>4</sub> capsules; (b,c) TiO<sub>2</sub>-(PAH/PSS)<sub>4</sub> composite capsules.

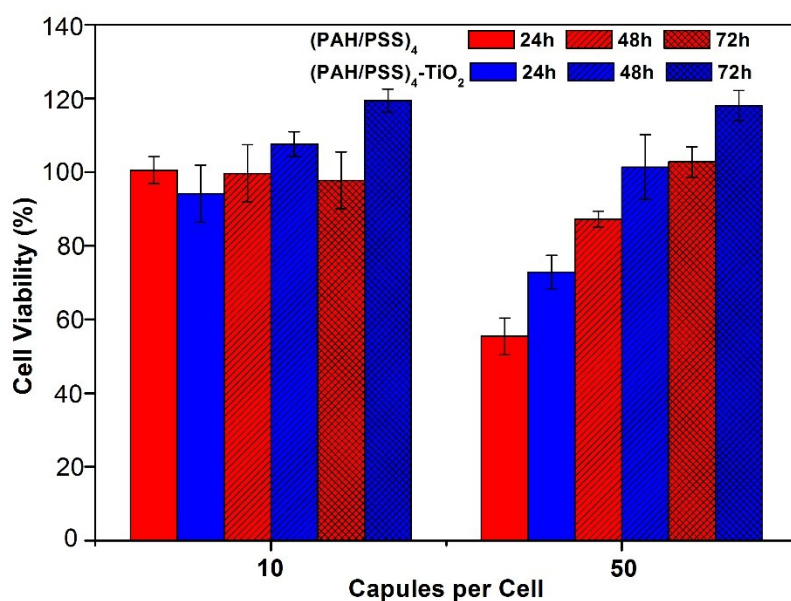

Figure S8 Cell viability of B50 cell line mixed with different concentration of PAH/PSS, PAH/PSS/TiO<sub>2</sub> capsules for 24 h, 48h and 72 h at 37 °C respectively as measured by an MTT assay compared with the control. The error bars show the standard deviations.
